# Supplementary material
Source: PubMed Central journal article supplement (PMC2707148)
Supplement: NIHMS86636-supplement-1_si_001.pdf [file NIHMS86636-supplement-1_si_001.pdf]

## Supporting Information

### The Sesquiterpene Synthase from the Botrydial Biosynthetic Gene Cluster of the Phytopathogen *Botrytis cinerea*

Cristina Pinedo,<sup>1</sup>† Chieh-Mei Wang,<sup>2</sup>† Jean-Marc Pradier,<sup>3</sup> Bérengère Dalmais,<sup>3</sup> Mathias Choquer,<sup>3</sup> Pascal Le Pêcheur,<sup>3</sup> Guillaume Morgant,<sup>3</sup> Isidro G. Collado,<sup>1</sup>\* David E. Cane,<sup>2</sup>\* Muriel Viaud<sup>3</sup>\*

<sup>1</sup>Departamento de Química Orgánica, Facultad de Ciencias, Universidad de Cádiz, 11510 Puerto Real, Spain. <sup>2</sup>Department of Chemistry, Box H, Brown University, Providence, Rhode Island 02912-9108 USA. <sup>3</sup>UMR BIOGER, INRA, Route de Saint-Cyr, 78086 Versailles, France

†These authors contributed equally to this work.

\*To whom correspondence should be addressed. E-mail: [isidro.gonzalez@uca.es](mailto:isidro.gonzalez@uca.es); [David\\_Cane@brown.edu](mailto:David_Cane@brown.edu); [viaud@versailles.inra.fr](mailto:viaud@versailles.inra.fr)

**Supplementary Table 1.** Primers used in quantitative RT-PCR

| Gene                      | Forward primer | Sequence 5'>3'            | Reverse primer | Sequence 5'>3'               | Size (bp) |
|---------------------------|----------------|---------------------------|----------------|------------------------------|-----------|
| <i>BcBOT4</i>             | BD1            | GGGAACCGAGGTCAATGTCA      | BD13           | GCTTGAATTCCCAGGGATCTG        | 77        |
| <i>BcBOT5</i>             | BD28           | CACGAACTGGACAAAGGCTAAA    | BD29           | ACCACCCGCAATCAAAGC           | 70        |
| <i>BcBOT3<sup>a</sup></i> | BD12           | CTAAGGGCTCGCGGAGTTG       | BD24           | GCATTGCGCTGGCAAGA            | 69        |
| <i>BcBOT2<sup>b</sup></i> | BD5            | CAGGTTATCCCTTTGCATGAGTAGT | BD17           | TTACTACTGGTGAATGATGTTTTGTCTT | 95        |
| <i>BcBOT1<sup>c</sup></i> | BD8            | GGCTCCCCTGCTTGCA          | BD20           | GCGAGGTGAAGAAGTTAGAGAAGGT    | 76        |
| <i>EF1B</i>               | BcEF1b-F       | GCTGCCAAGTCTGTTGTCACA     | BcEF1b-R       | CAATGCTACCATGTCCGGTCTCA      | 66        |

<sup>a</sup>Formerly *CND11*. <sup>b</sup>Formerly *CND15*. <sup>c</sup>Formerly *CND5*.

**Supplementary Table 2.** Primers used for gene inactivation

| Primer       | Sequence 5'>3' (restriction sites indicated in bold)  |
|--------------|-------------------------------------------------------|
| Cyc1         | GAA GCG TGC CTA GCA CTT GT                            |
| Cyc2         | TGA TCA TCC TGG AGG GAT TC                            |
| CycA-seam    | AGT TAC <b>TCT TCA</b> CAC GCG ATC AGC CTT AGC GAG TA |
| CycB-seam    | AGT TAC <b>TCT TCA</b> TGG GTC CGG AAC ACG AAC GAA TG |
| Bar-seam-up  | TTA <b>CTC TTC</b> ACC ACC TGA ATG GCG AAT GGA AAT    |
| Bar-seam-low | TTA <b>CTC TTC</b> AGT GCA CGG AAA TGT TGA ATA CTC    |
| Nat1-F-NN    | GCG GCC GCC <b>CAT GGG</b> AAC TCT CTA GAG CCG C      |
| Nat1-R-SS    | ACT AGT <b>CCG CGG</b> AAT TCC TGC AGG CCG CTC        |
| Cyc5         | GGC CAG GTA TCT TGG ACA GA                            |
| Bar547       | CAT GCGCAC GCT CGG GTC GTT                            |

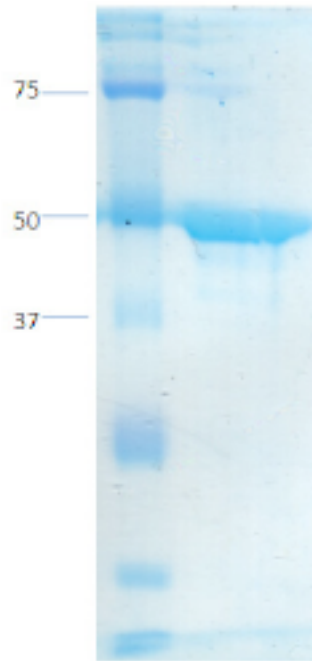

**Supplementary Figure 1.** SDS-PAGE Analysis. Left lane, molecular weight markers. Right lane, recombinant His<sub>6</sub>tag-BcBOT2 protein

a

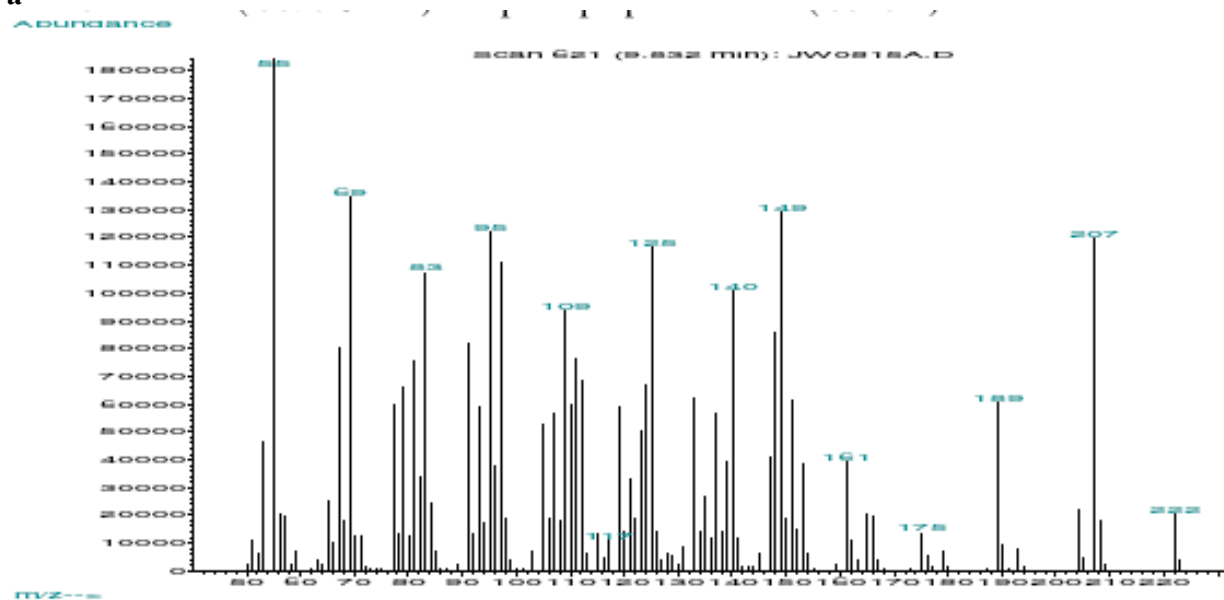

b

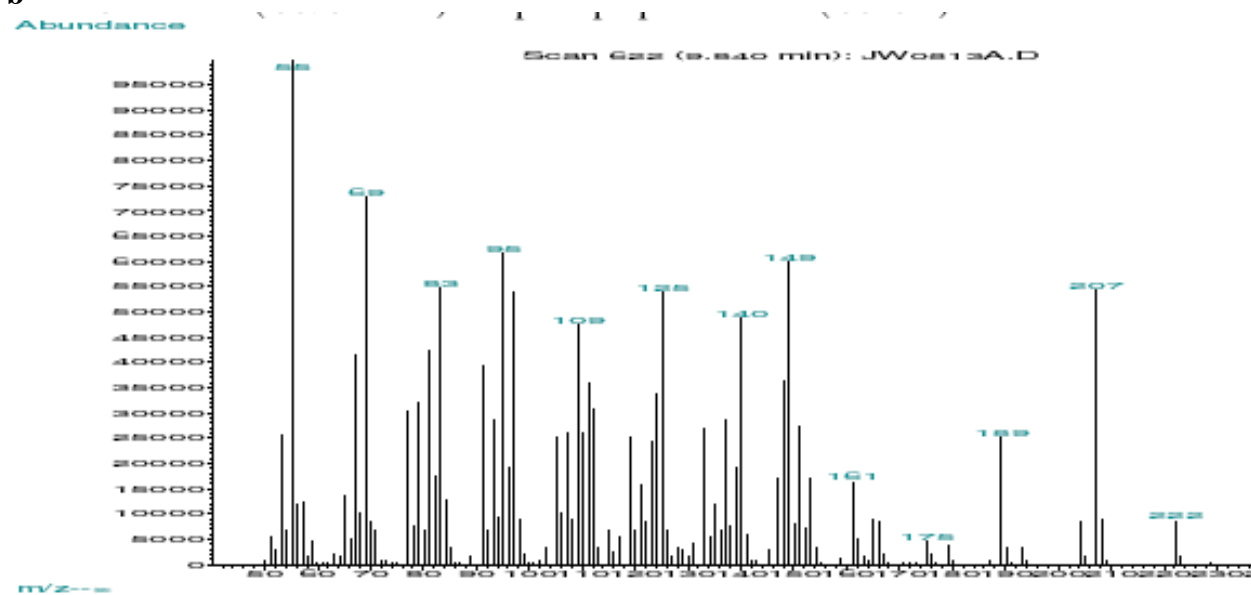

**Supplementary Figure 2.** GC-MS analysis of the enzymatic cyclization of FPP by BcBOT2 protein. A. MS of authentic presilphiperfolan-8-ol (**10**). B. MS of presilphiperfolan-8-ol (**10**) from incubation of FPP (60  $\mu$ M) with BcBOT2 protein (1  $\mu$ M) at 30 °C for 1 h.

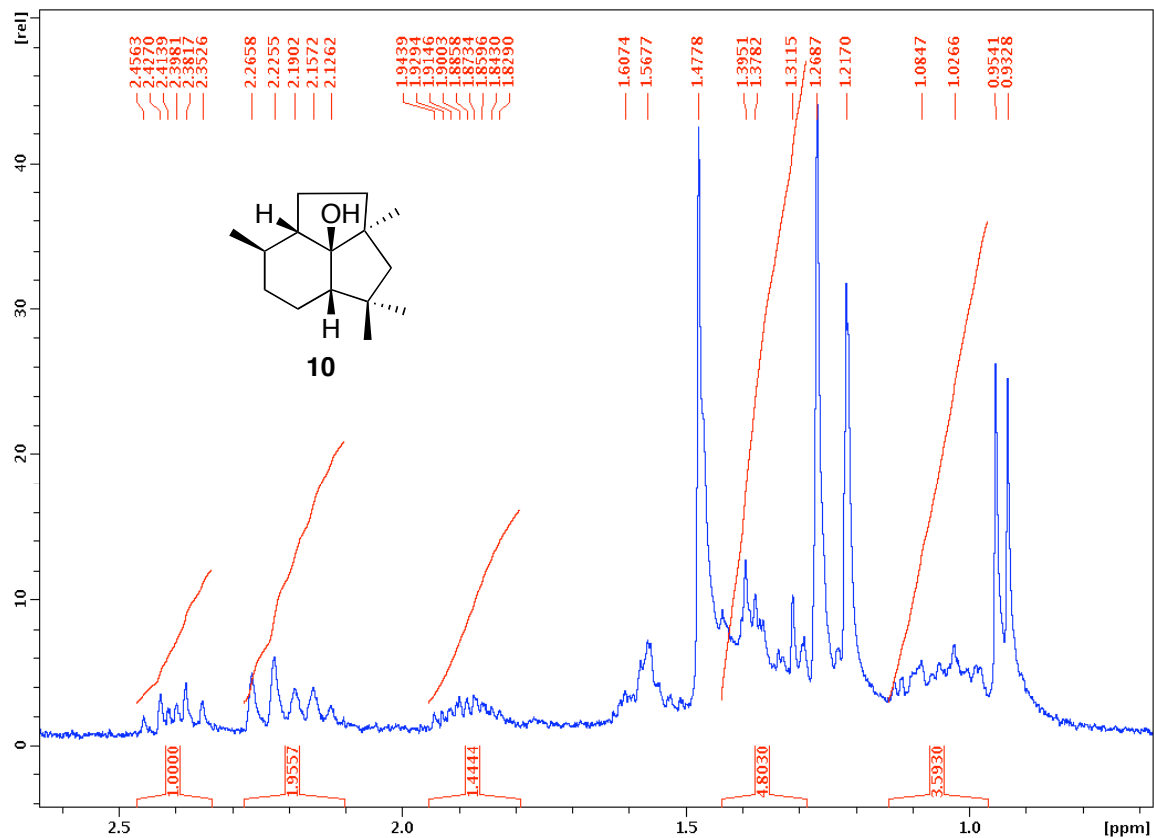

**Supplementary Figure 3.**  $^1\text{H}$  NMR ( $\text{C}_6\text{D}_6$ , 300 MHz) spectrum of the enzymatically generated presilphiperfolan-8-ol (**10**) from the incubation of FPP ( $60\ \mu\text{M}$ ) with BcBOT2 protein ( $1\ \mu\text{M}$ ) at  $30\ ^\circ\text{C}$  for 2 h.

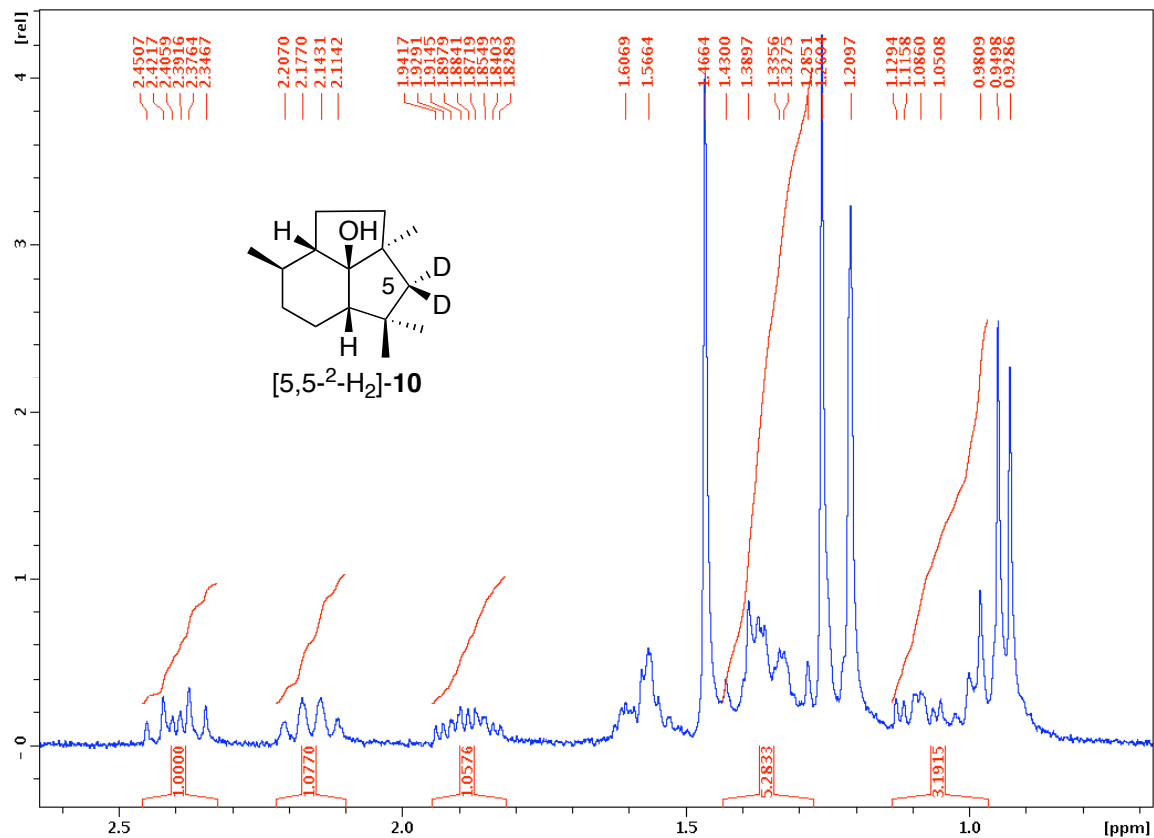

**Supplementary Figure 4.**  $^1\text{H}$  NMR ( $\text{C}_6\text{D}_6$ , 300 MHz) spectrum of the enzymatically generated  $[5,5\text{-}^2\text{H}_2]$ -presilphiperfolan-8-ol (**10**) from the incubation of  $[1,1\text{-}^2\text{H}_2]$ -FPP ( $60\ \mu\text{M}$ ) with BcBOT2 protein ( $1\ \mu\text{M}$ ) at  $30\ ^\circ\text{C}$  for 2 h.

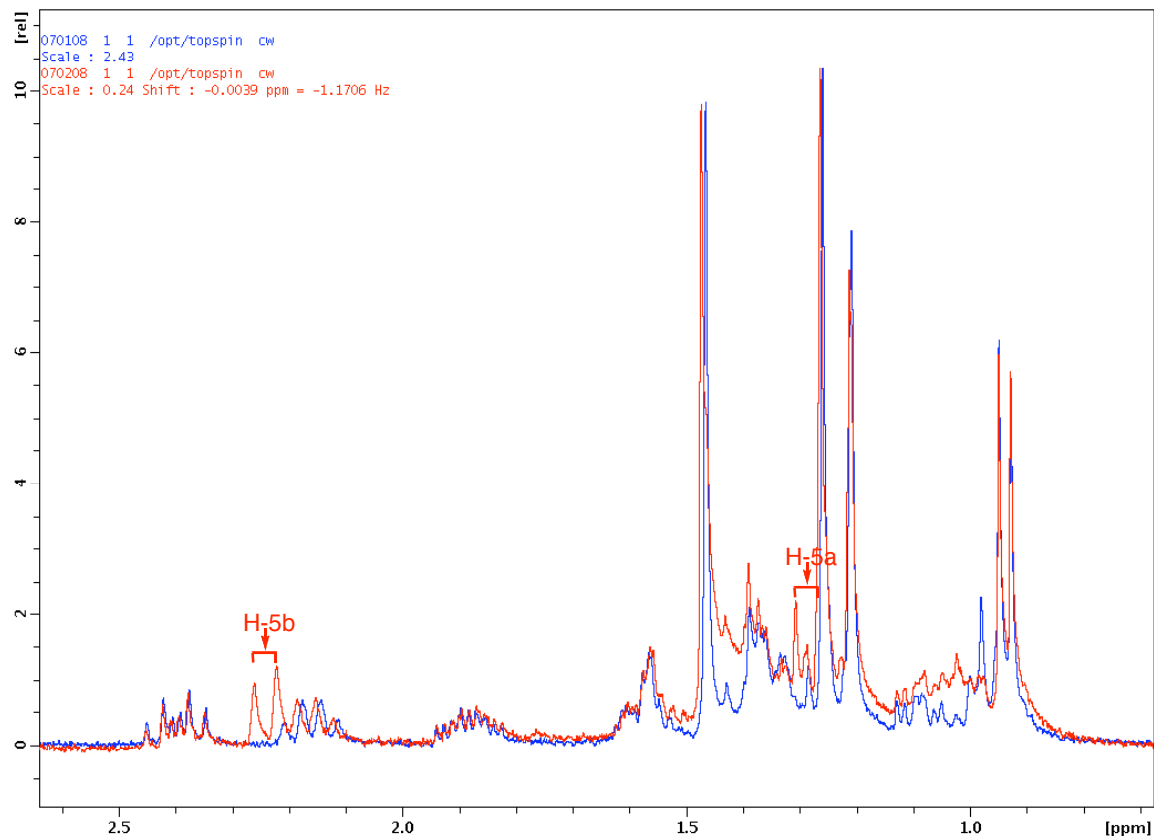

**Supplementary Figure 5.** Superposition of  $^1\text{H}$  NMR spectra of **10** (red) and  $[5,5\text{-}^2\text{H}_2]\text{-10}$  (blue).

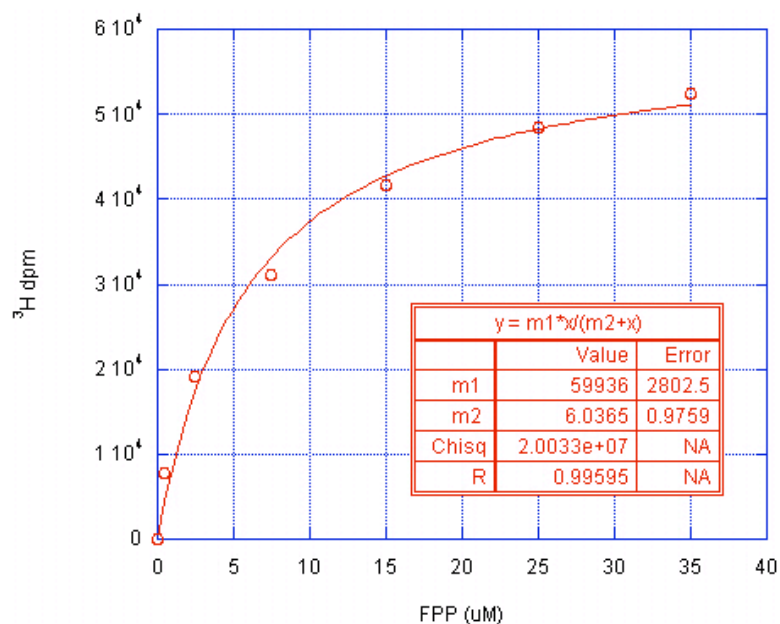

**Supplementary Figure 6.** Michaelis-Menten plot of the reaction velocity of the formation of presilphiperfolan-8 $\beta$ -ol (**10**) as a function of the concentration of FPP.
